# Supplementary material for: (R/S)-Ethyl 2-acetoxy-4-phenyl-4H-chromene-3-carboxylate
Source: Preprints.org preprint supplement (doi:10.20944/preprints202408.1042.v1), 2024-08-15
Supplement: Supplementary file 1 [file supplementary]

Supplementary Materials

**Ethyl 2-acetoxy-4-phenyl-4H-chromene-3-carboxylate**

Nevena I. Petkova-Yankova* , Ana I. Koleva and Rositca D. Nikolova*

2 Faculty of Chemistry and Pharmacy, Sofia University St. Kl. Ohridski, Sofia, Bulgaria, ohak@chem.uni-sofia.bg;

***** Correspondence: [rnikolova@chem.uni-sofia.bg](mailto:rnikolova@chem.uni-sofia.bg) ; [nipetkova@chem.uni-sofia.bg](mailto:nipetkova@chem.uni-sofia.bg)

**List of contents:**

1H NMR spectrum of ethyl 2-acetoxy-4-phenyl-4*H*-chromene-3-carboxylate in CDCl3 S2

13C NMR spectrum of ethyl 2-acetoxy-4-phenyl-4*H*-chromene-3-carboxylate in CDCl3 S2

DEPT135 spectrum of ethyl 2-acetoxy-4-phenyl-4*H*-chromene-3-carboxylate in CDCl3 S3

13C NMR with DEPT135 spectra of ethyl 2-acetoxy-4-phenyl-4*H*-chromene-3-carboxylate in CDCl3 S3

2D COSY spectrum of ethyl 2-acetoxy-4-phenyl-4*H*-chromene-3-carboxylate in CDCl3 S4

{1H,13C} HSQC spectrum of ethyl 2-acetoxy-4-phenyl-4*H*-chromene-3-carboxylate in CDCl3 S4

{1H,13C} HMBC spectrum of ethyl 2-acetoxy-4-phenyl-4*H*-chromene-3-carboxylate in CDCl3 S5

NOESY spectrum of ethyl 2-acetoxy-4-phenyl-4*H*-chromene-3-carboxylate in CDCl3 S5

**1H NMR** spectrum of ethyl 2-acetoxy-4-phenyl-4*H*-chromene-3-carboxylate in CDCl3

**13C NMR** spectrum of ethyl 2-acetoxy-4-phenyl-4*H*-chromene-3-carboxylate in CDCl3

**DEPT135** spectra of ethyl 2-acetoxy-4-phenyl-4*H*-chromene-3-carboxylate in CDCl3

**13C NMR** with **DEPT135** spectra of ethyl 2-acetoxy-4-phenyl-4*H*-chromene-3-carboxylate in CDCl3

2D **COSY** spectrum of ethyl 2-acetoxy-4-phenyl-4*H*-chromene-3-carboxylate in CDCl3

{1H,13C} **HSQC** spectrum of ethyl 2-acetoxy-4-phenyl-4*H*-chromene-3-carboxylate in CDCl3

{1H,13C} **HMBC** spectrum of ethyl 2-acetoxy-4-phenyl-4*H*-chromene-3-carboxylate in CDCl3

**NOESY** spectrum of ethyl 2-acetoxy-4-phenyl-4*H*-chromene-3-carboxylate in CDCl3

**IR** spectrum of ethyl 2-acetoxy-4-phenyl-4H-chromene-3-carboxylate in CHCl3

**HRMS** (FTMS-p ESI) m/z calculated for C20H18O5 [M+CH3OH+H]+ 371.1495 found 371.1485 (ppm: 1.0).
