# Supplementary material for: (R/S)-Ethyl 2-acetoxy-4-phenyl-4H-chromene-3-carboxylate
Source: Preprints.org preprint supplement (doi:10.20944/preprints202408.1042.v1), 2024-08-15
Supplement: Supplementary file 3 [file supplementary]

## Supplementary Materials

# Ethyl 2-acetoxy-4-phenyl-4H-chromene-3-carboxylate

Nevena I. Petkova-Yankova\*, Ana I. Koleva and Rositca D. Nikolova\*

<sup>2</sup> Faculty of Chemistry and Pharmacy, Sofia University St. Kl. Ohridski, Sofia, Bulgaria, ohak@chem.uni-sofia.bg;

\* Correspondence: [nikolova@chem.uni-sofia.bg](mailto:nikolova@chem.uni-sofia.bg) ; [nipetkova@chem.uni-sofia.bg](mailto:nipetkova@chem.uni-sofia.bg)

### List of contents:

|                                                                                                                             |    |
|-----------------------------------------------------------------------------------------------------------------------------|----|
| <sup>1</sup> H NMR spectrum of ethyl 2-acetoxy-4-phenyl-4H-chromene-3-carboxylate in CDCl <sub>3</sub>                      | S2 |
| <sup>13</sup> C NMR spectrum of ethyl 2-acetoxy-4-phenyl-4H-chromene-3-carboxylate in CDCl <sub>3</sub>                     | S2 |
| DEPT135 spectrum of ethyl 2-acetoxy-4-phenyl-4H-chromene-3-carboxylate in CDCl <sub>3</sub>                                 | S3 |
| <sup>13</sup> C NMR with DEPT135 spectra of ethyl 2-acetoxy-4-phenyl-4H-chromene-3-carboxylate in CDCl <sub>3</sub>         | S3 |
| 2D COSY spectrum of ethyl 2-acetoxy-4-phenyl-4H-chromene-3-carboxylate in CDCl <sub>3</sub>                                 | S4 |
| { <sup>1</sup> H, <sup>13</sup> C} HSQC spectrum of ethyl 2-acetoxy-4-phenyl-4H-chromene-3-carboxylate in CDCl <sub>3</sub> | S4 |
| { <sup>1</sup> H, <sup>13</sup> C} HMBC spectrum of ethyl 2-acetoxy-4-phenyl-4H-chromene-3-carboxylate in CDCl <sub>3</sub> | S5 |
| NOESY spectrum of ethyl 2-acetoxy-4-phenyl-4H-chromene-3-carboxylate in CDCl <sub>3</sub>                                   | S5 |

$^1\text{H}$  NMR spectrum of ethyl 2-acetoxy-4-phenyl-4*H*-chromene-3-carboxylate in  $\text{CDCl}_3$

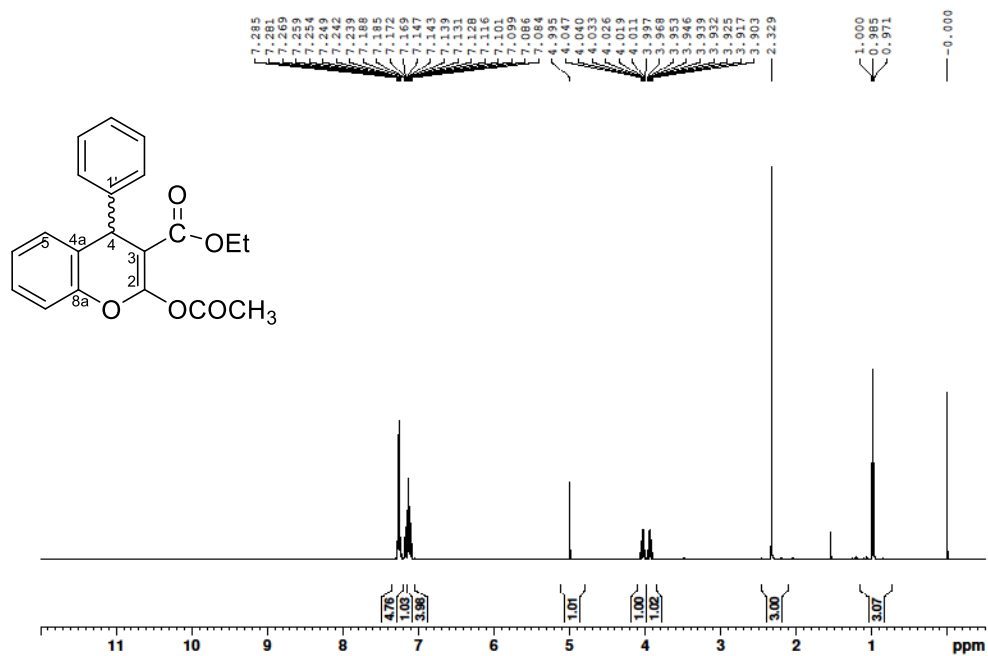

$^{13}\text{C}$  NMR spectrum of ethyl 2-acetoxy-4-phenyl-4*H*-chromene-3-carboxylate in  $\text{CDCl}_3$

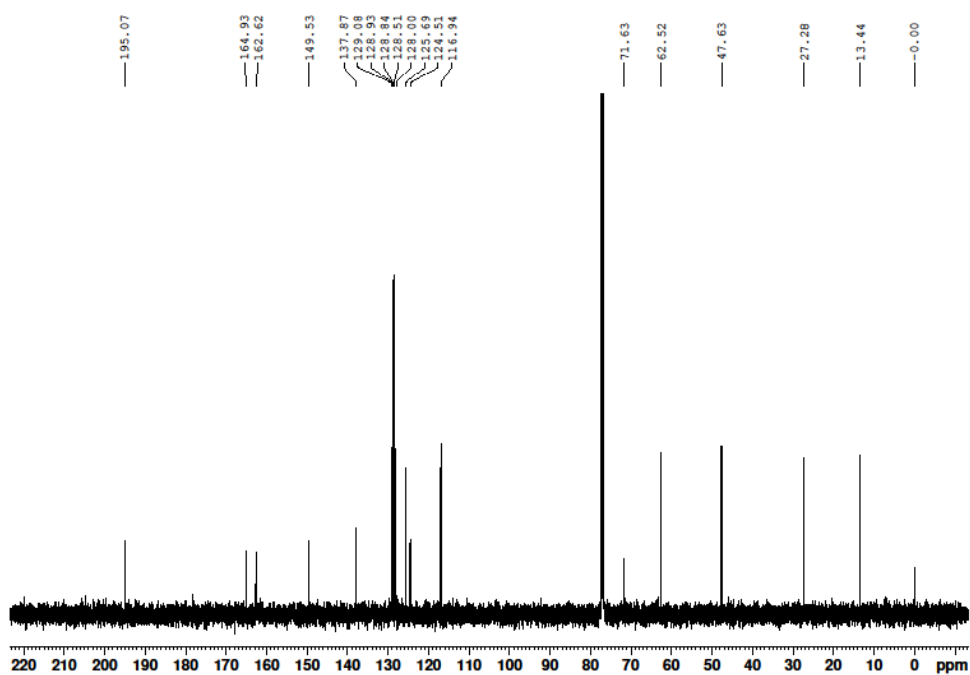

DEPT135 spectra of ethyl 2-acetoxy-4-phenyl-4*H*-chromene-3-carboxylate in CDCl<sub>3</sub>

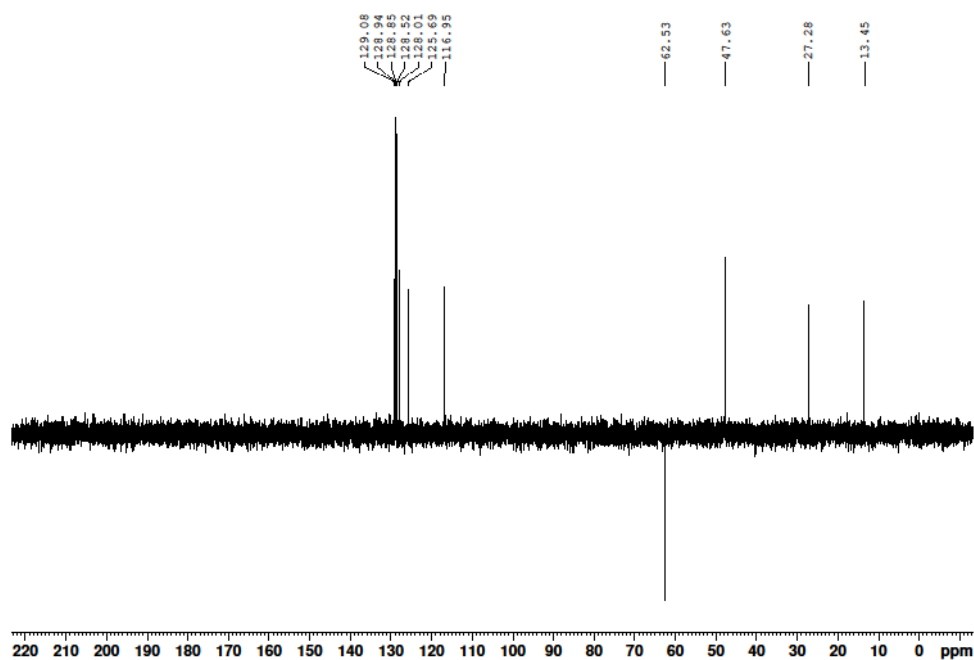

<sup>13</sup>C NMR with DEPT135 spectra of ethyl 2-acetoxy-4-phenyl-4*H*-chromene-3-carboxylate in CDCl<sub>3</sub>

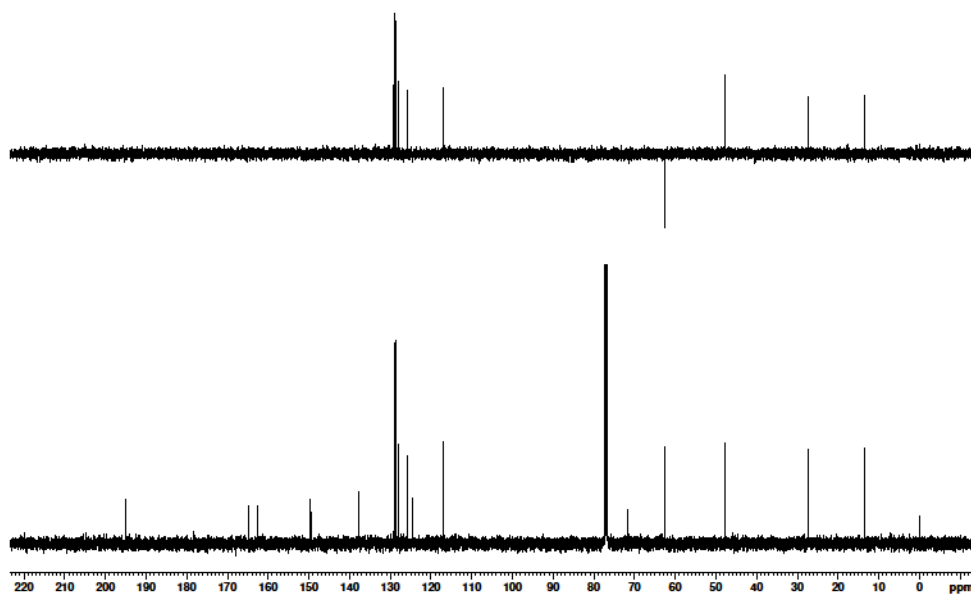

2D COSY spectrum of ethyl 2-acetoxy-4-phenyl-4*H*-chromene-3-carboxylate in CDCl<sub>3</sub>

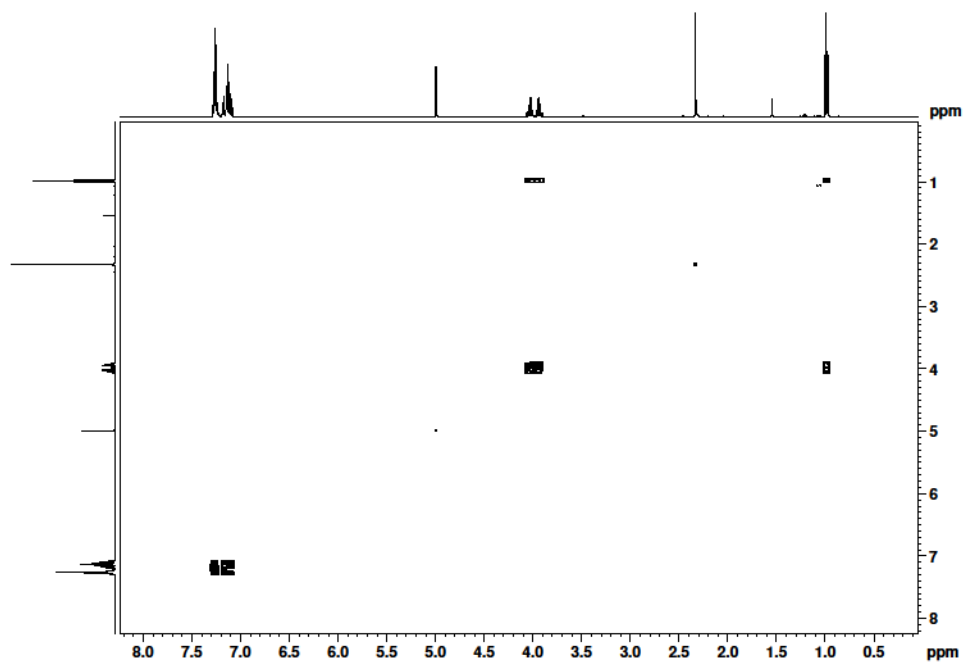

<sup>1</sup>H,<sup>13</sup>C} HSQC spectrum of ethyl 2-acetoxy-4-phenyl-4*H*-chromene-3-carboxylate in CDCl<sub>3</sub>

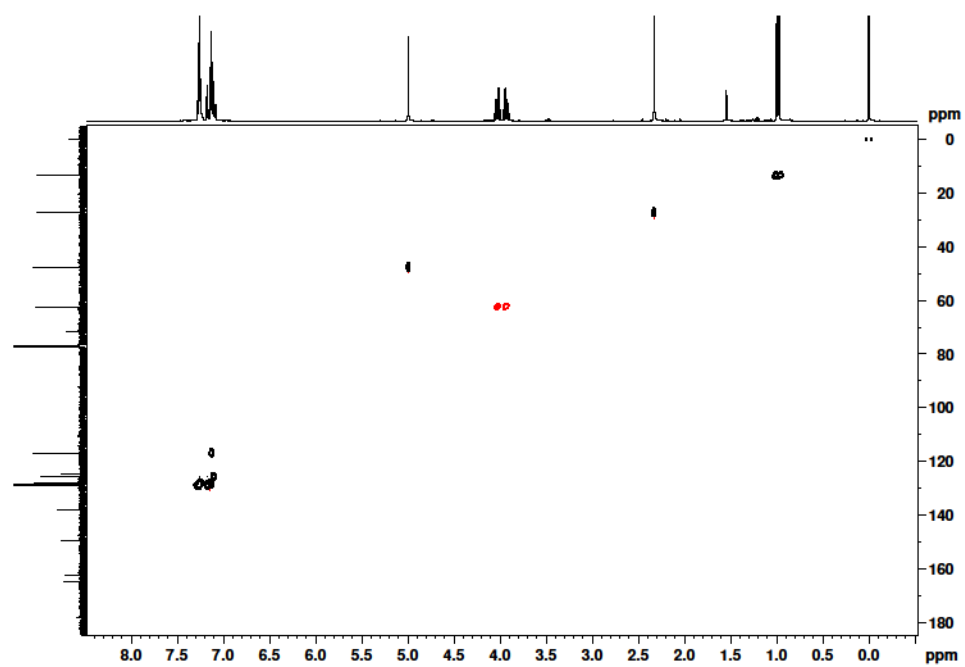

$\{^1\text{H}, ^{13}\text{C}\}$  HMBC spectrum of ethyl 2-acetoxy-4-phenyl-4*H*-chromene-3-carboxylate in  $\text{CDCl}_3$

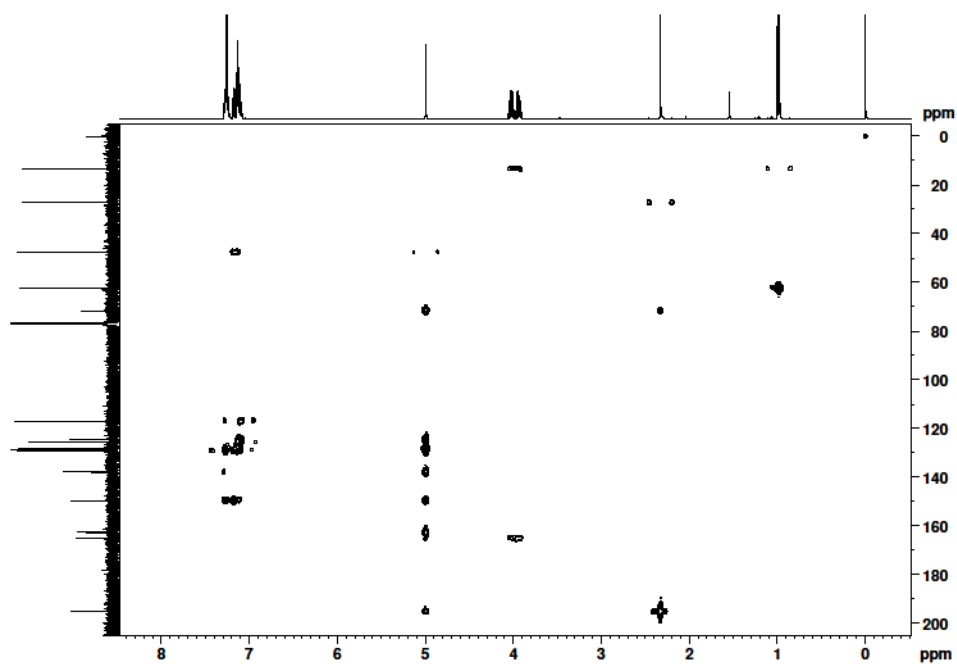

NOESY spectrum of ethyl 2-acetoxy-4-phenyl-4*H*-chromene-3-carboxylate in  $\text{CDCl}_3$

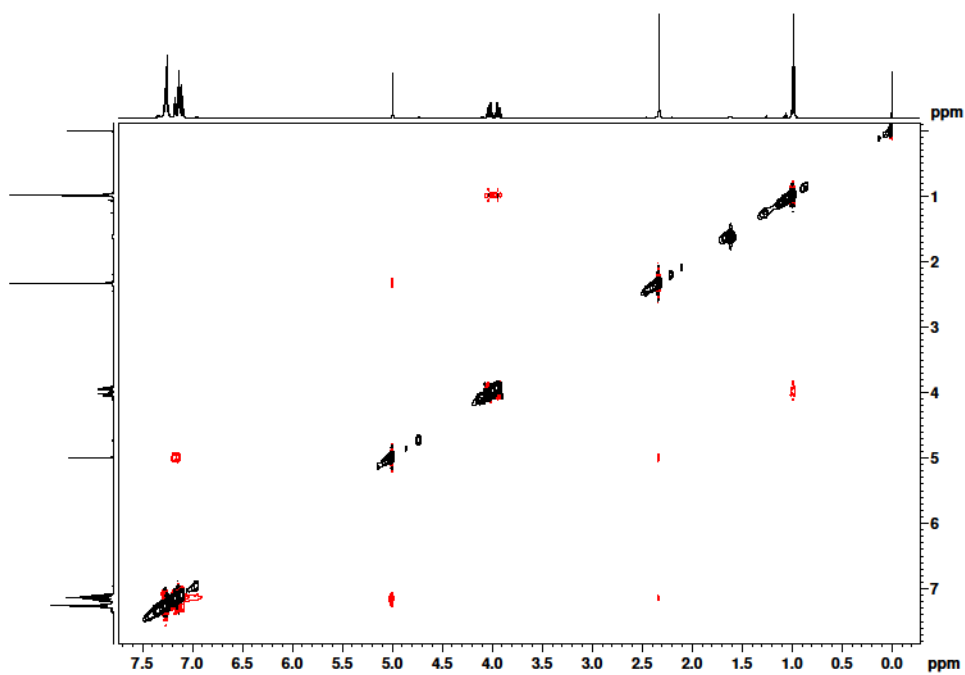

Two ECG strips are shown. The left strip has handwritten notes above it: 'Vorstudie 1/8x', 'Zeit 2:00', and 'Verstärkung 4'. The right strip has handwritten notes above it: 'Puls 75', 'Rhythmus 75', and 'Normales EKG'. Both strips show a regular sinus rhythm with a rate of approximately 75 bpm. The left strip shows a regular rhythm with a rate of approximately 75 bpm. The right strip shows a regular rhythm with a rate of approximately 75 bpm.

NPY-1139 #579 BT-5 54 AV: 1 NL: 1.09E+008  
206040.737388157505  
[21.000000, 8.00] Full ms [83.0000-1245.0000]  
210835.19185105732329  
2062300003510045000088  
m/z

PY-1139 #581 RT: 5.56 AV: 1 NL: 4.28E+007  
 371.1484889759034  
 FTMS + CESTFTMS [83.0000-1245.0000]  
 2.33893372 15192394 13376  
 1224.0000 1224.0000 1224.0000  
 350550063 117200039095
