# Supplementary figures and images for: (R/S)-Ethyl 2-acetoxy-4-phenyl-4H-chromene-3-carboxylate
Source: Preprints.org preprint supplement (doi:10.20944/preprints202408.1042.v1), 2024-08-15

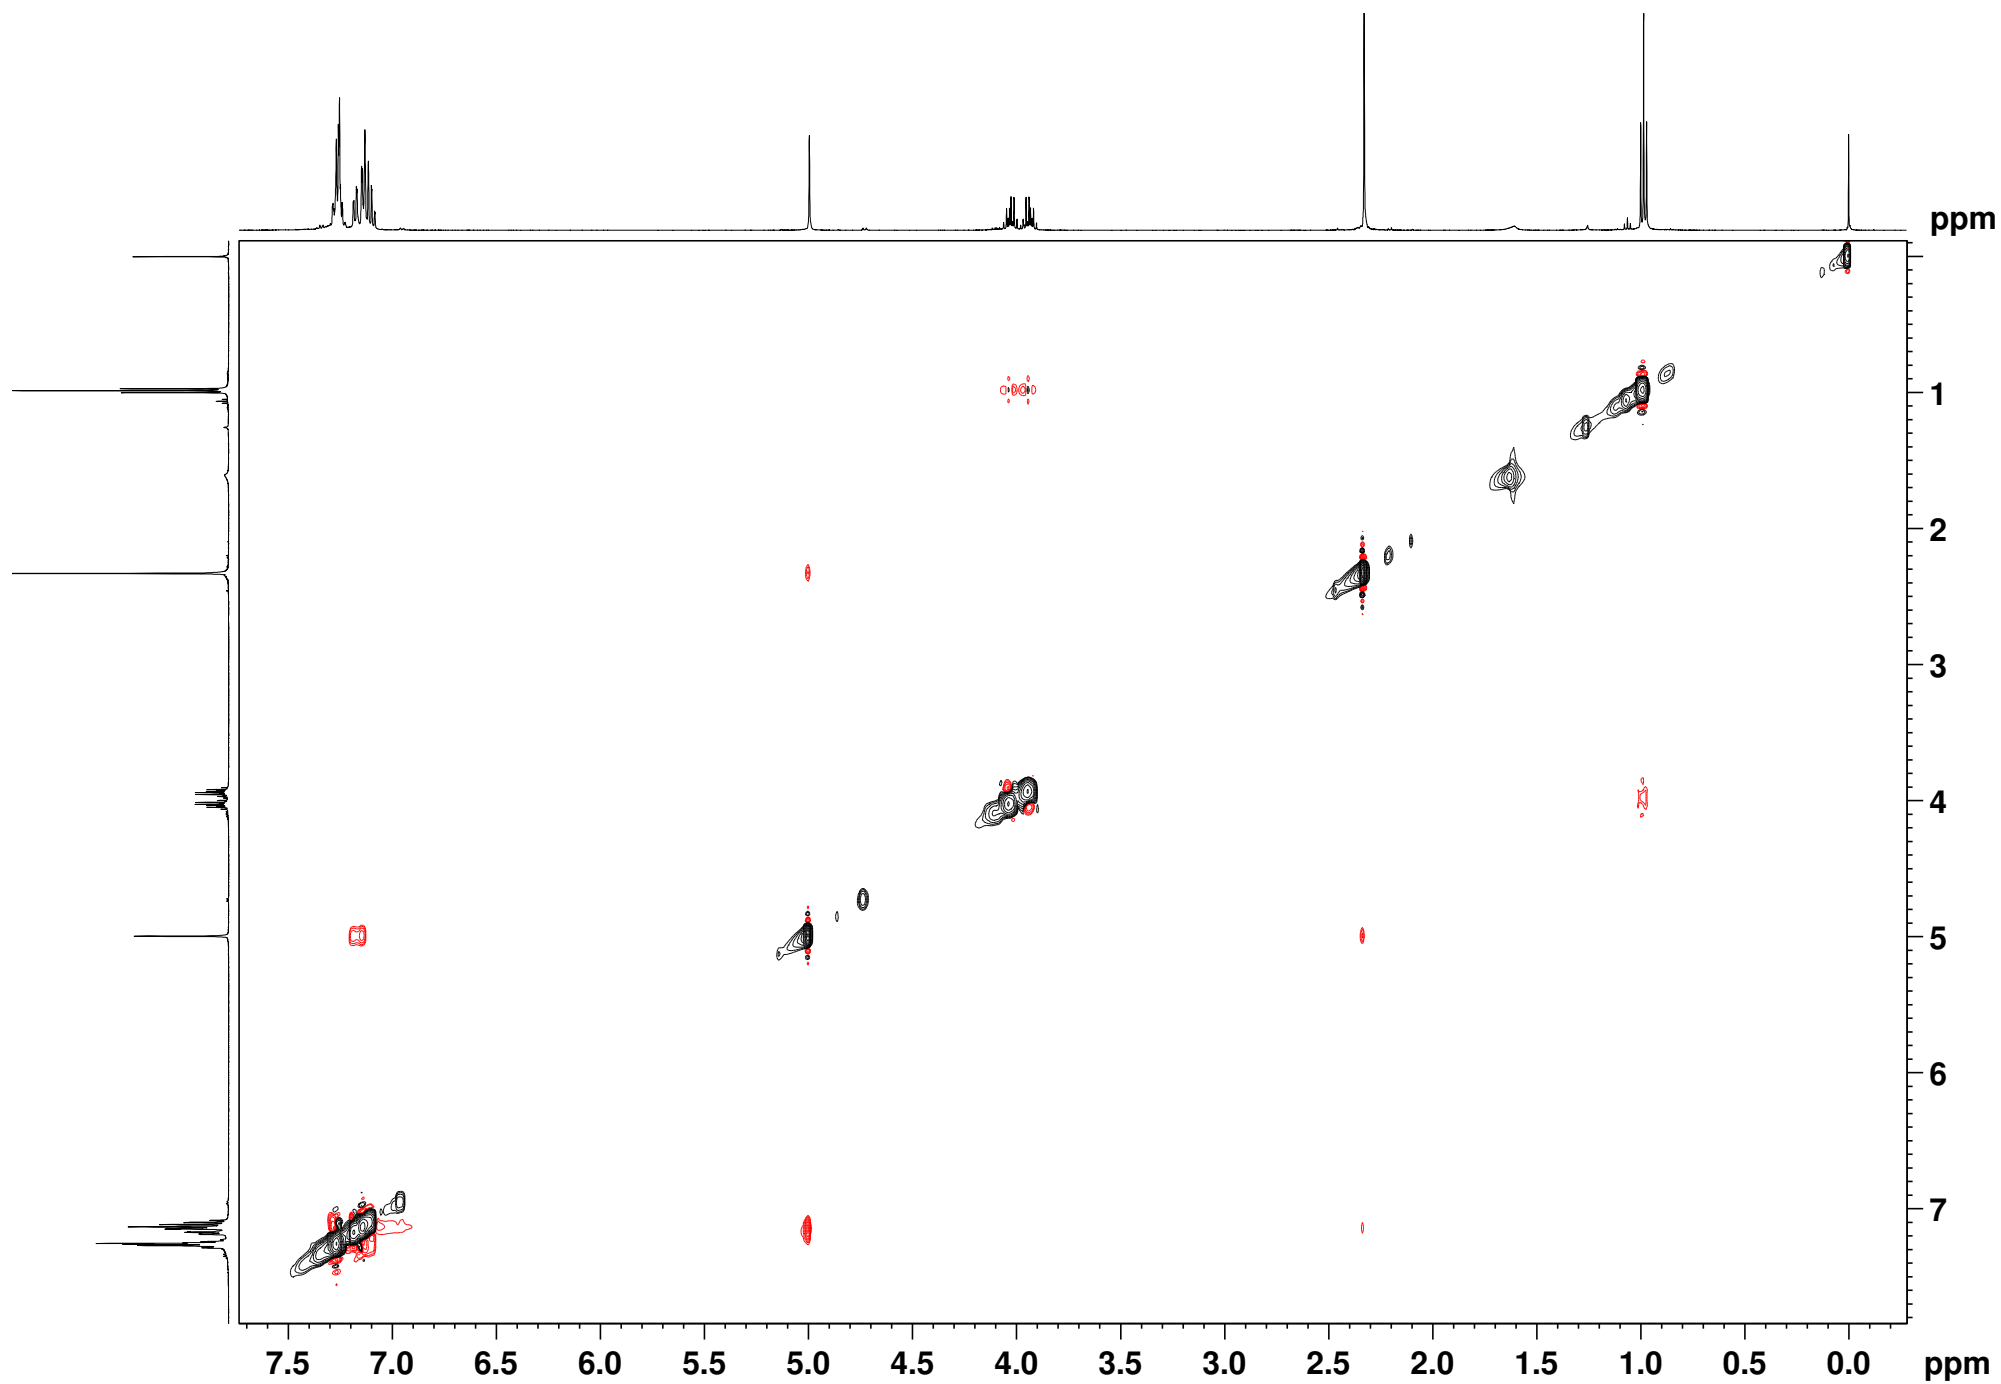

Supplement: Supplementary file 1 [file supplementary]

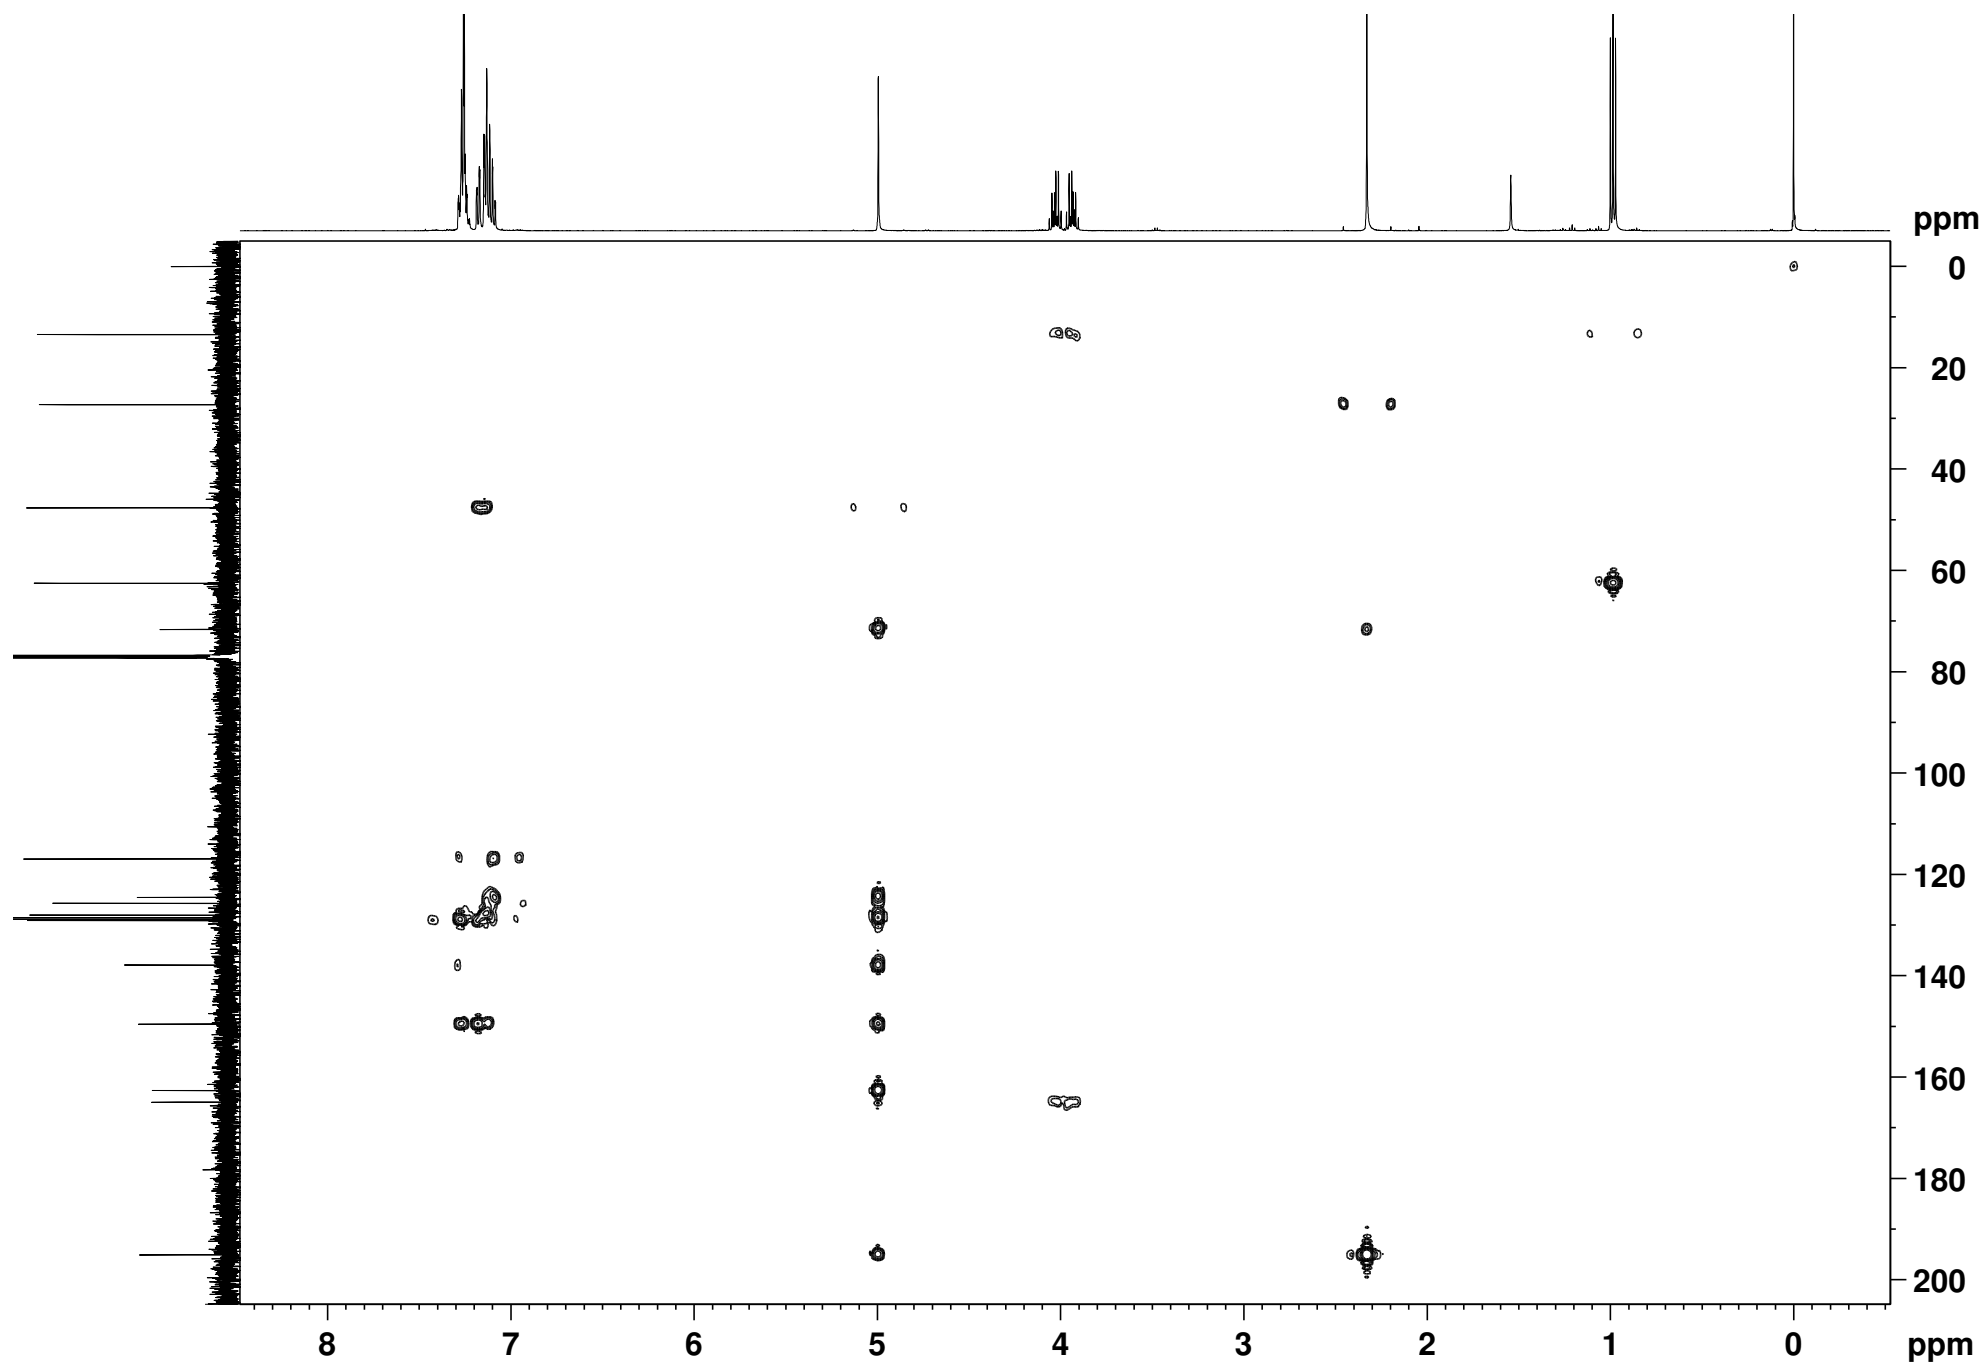

Supplement: Supplementary file 2 [file supplementary]

Nr.

Probe 417-86/4 47 T ~ 134-137°

Konzentration

CaCl<sub>2</sub>

Schichtdicke

0,6

Maßstab

1/2x

Spalt

8,3

Verstärkung

4

x 100 cm<sup>-1</sup>

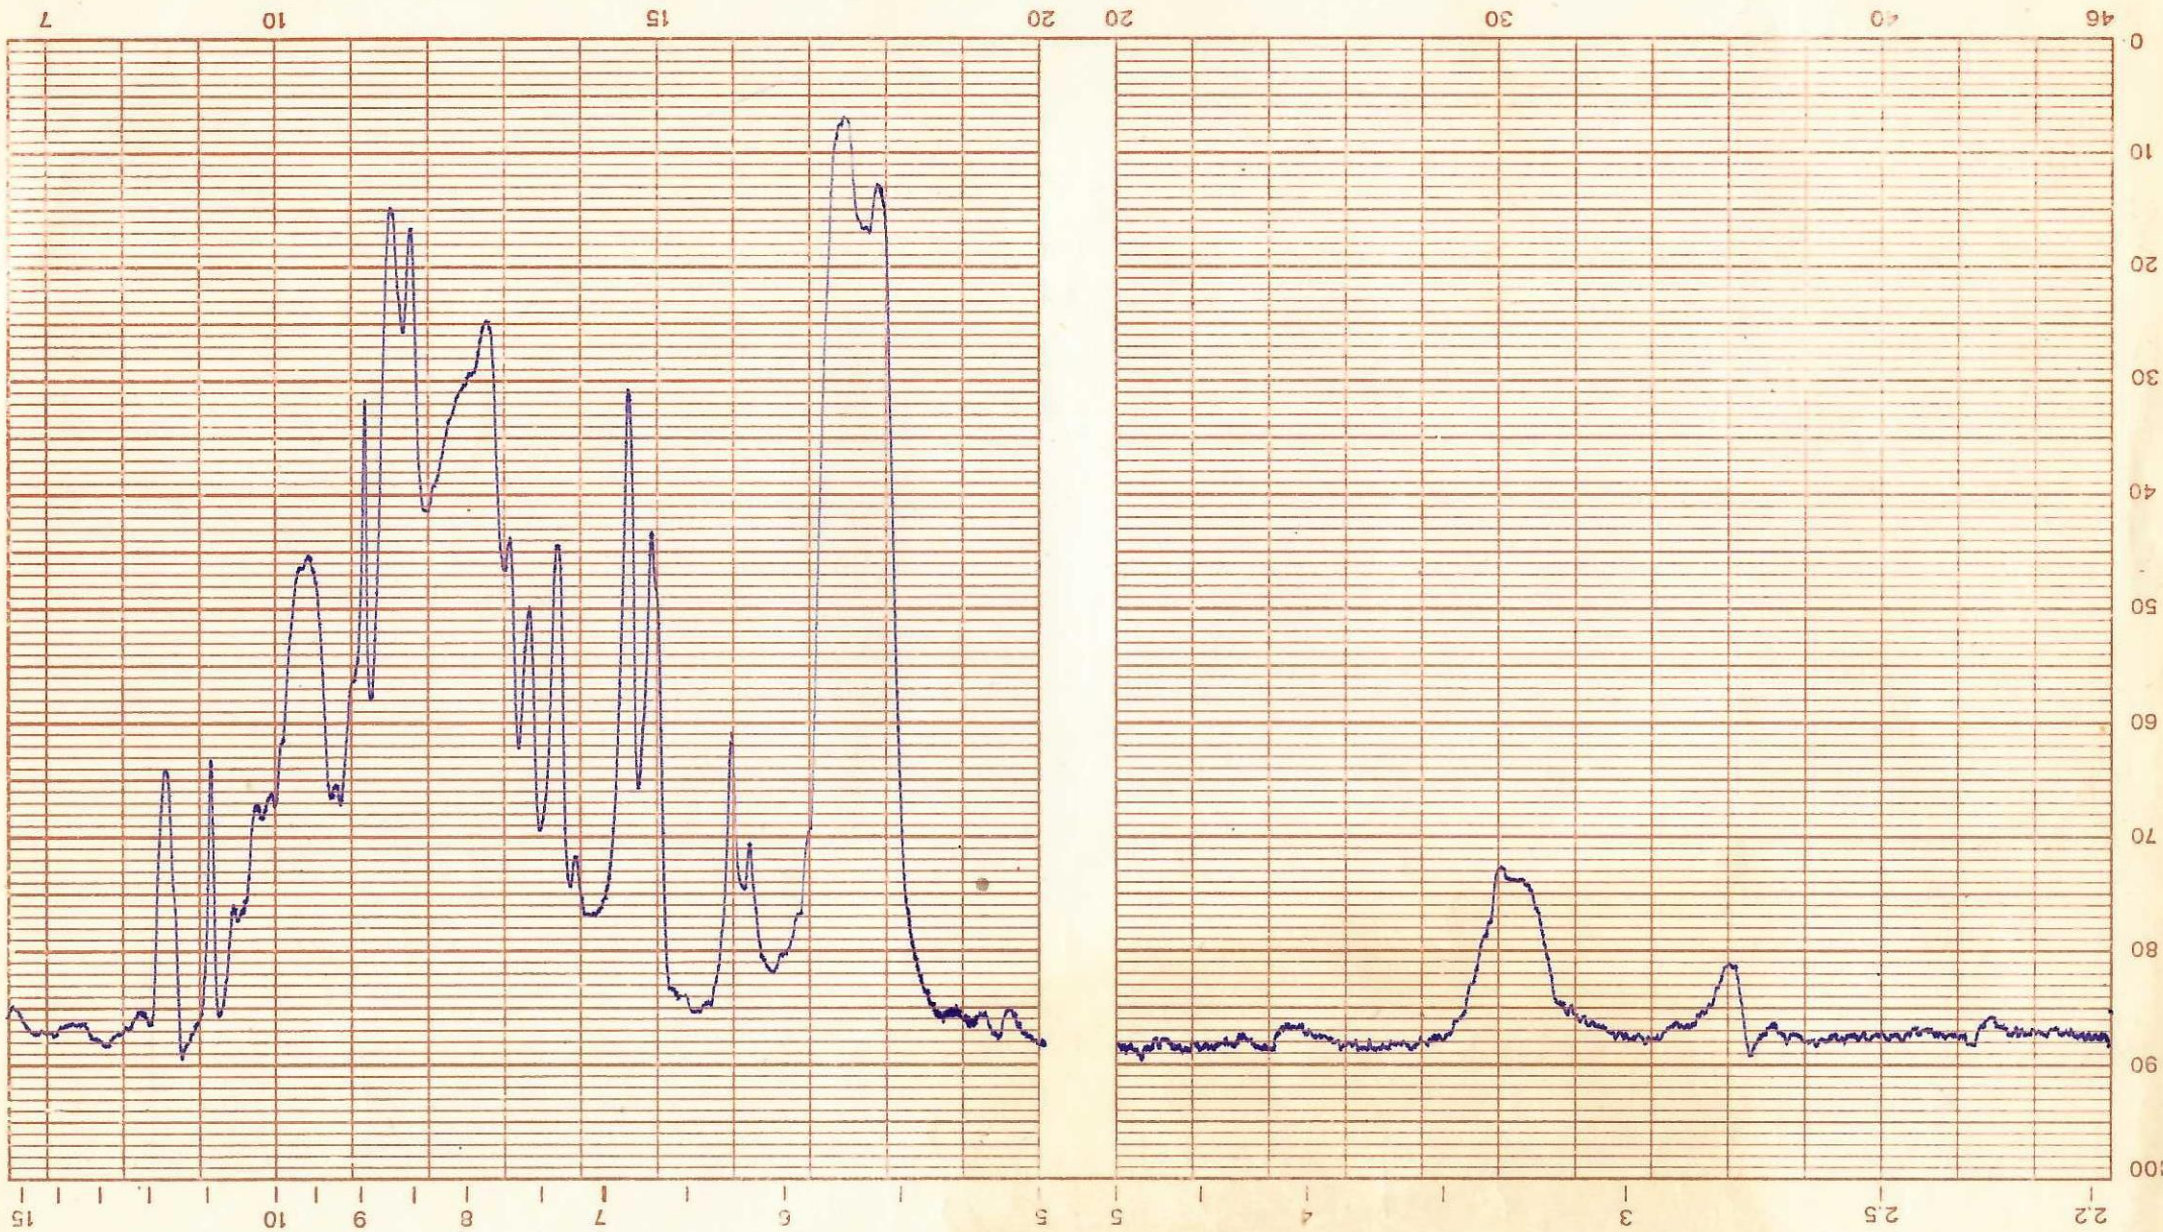

Supplement: Supplementary file 4 [file supplementary]

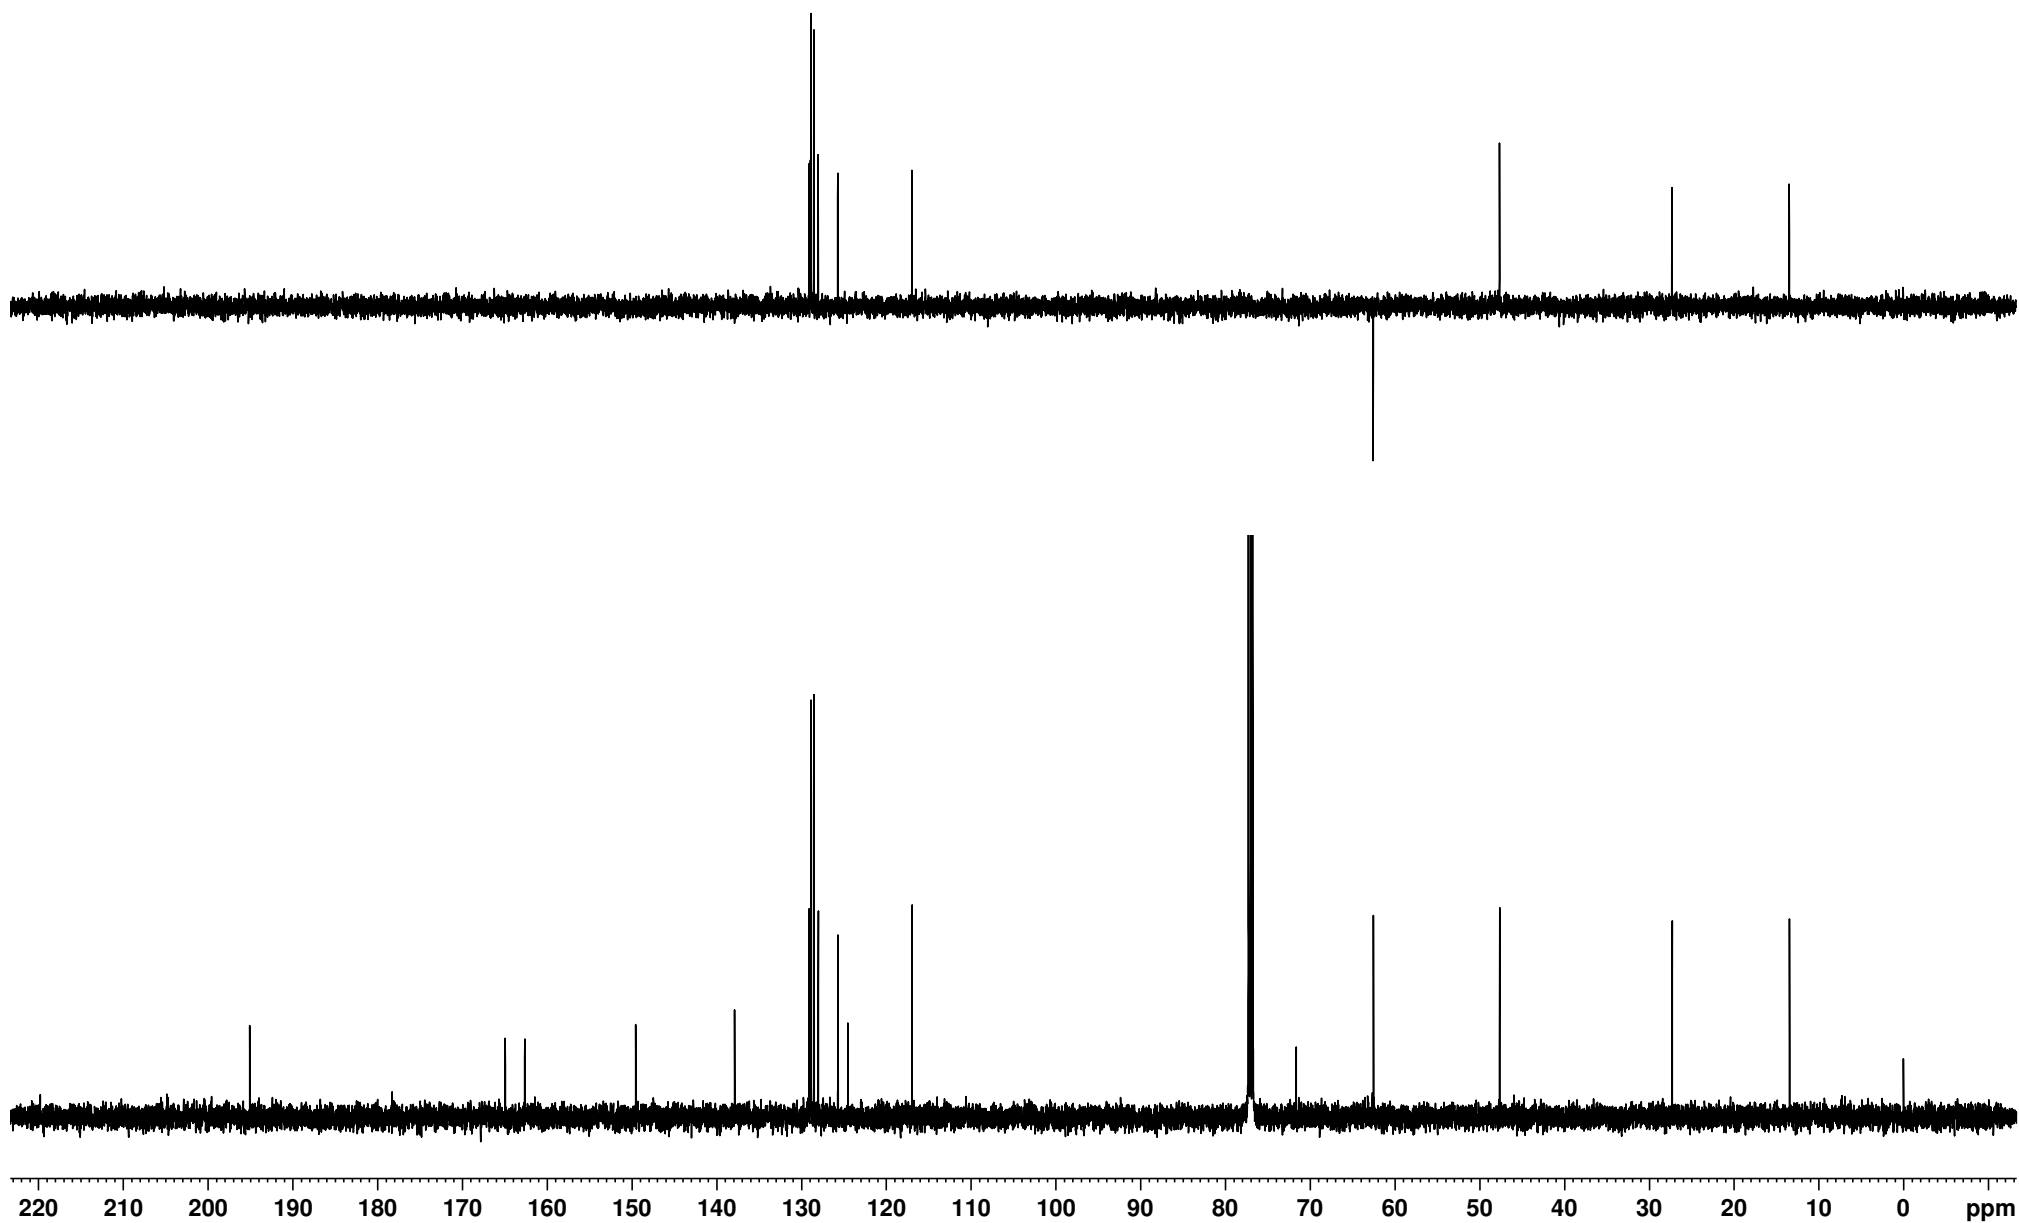

Supplement: Supplementary file 5 [file supplementary]

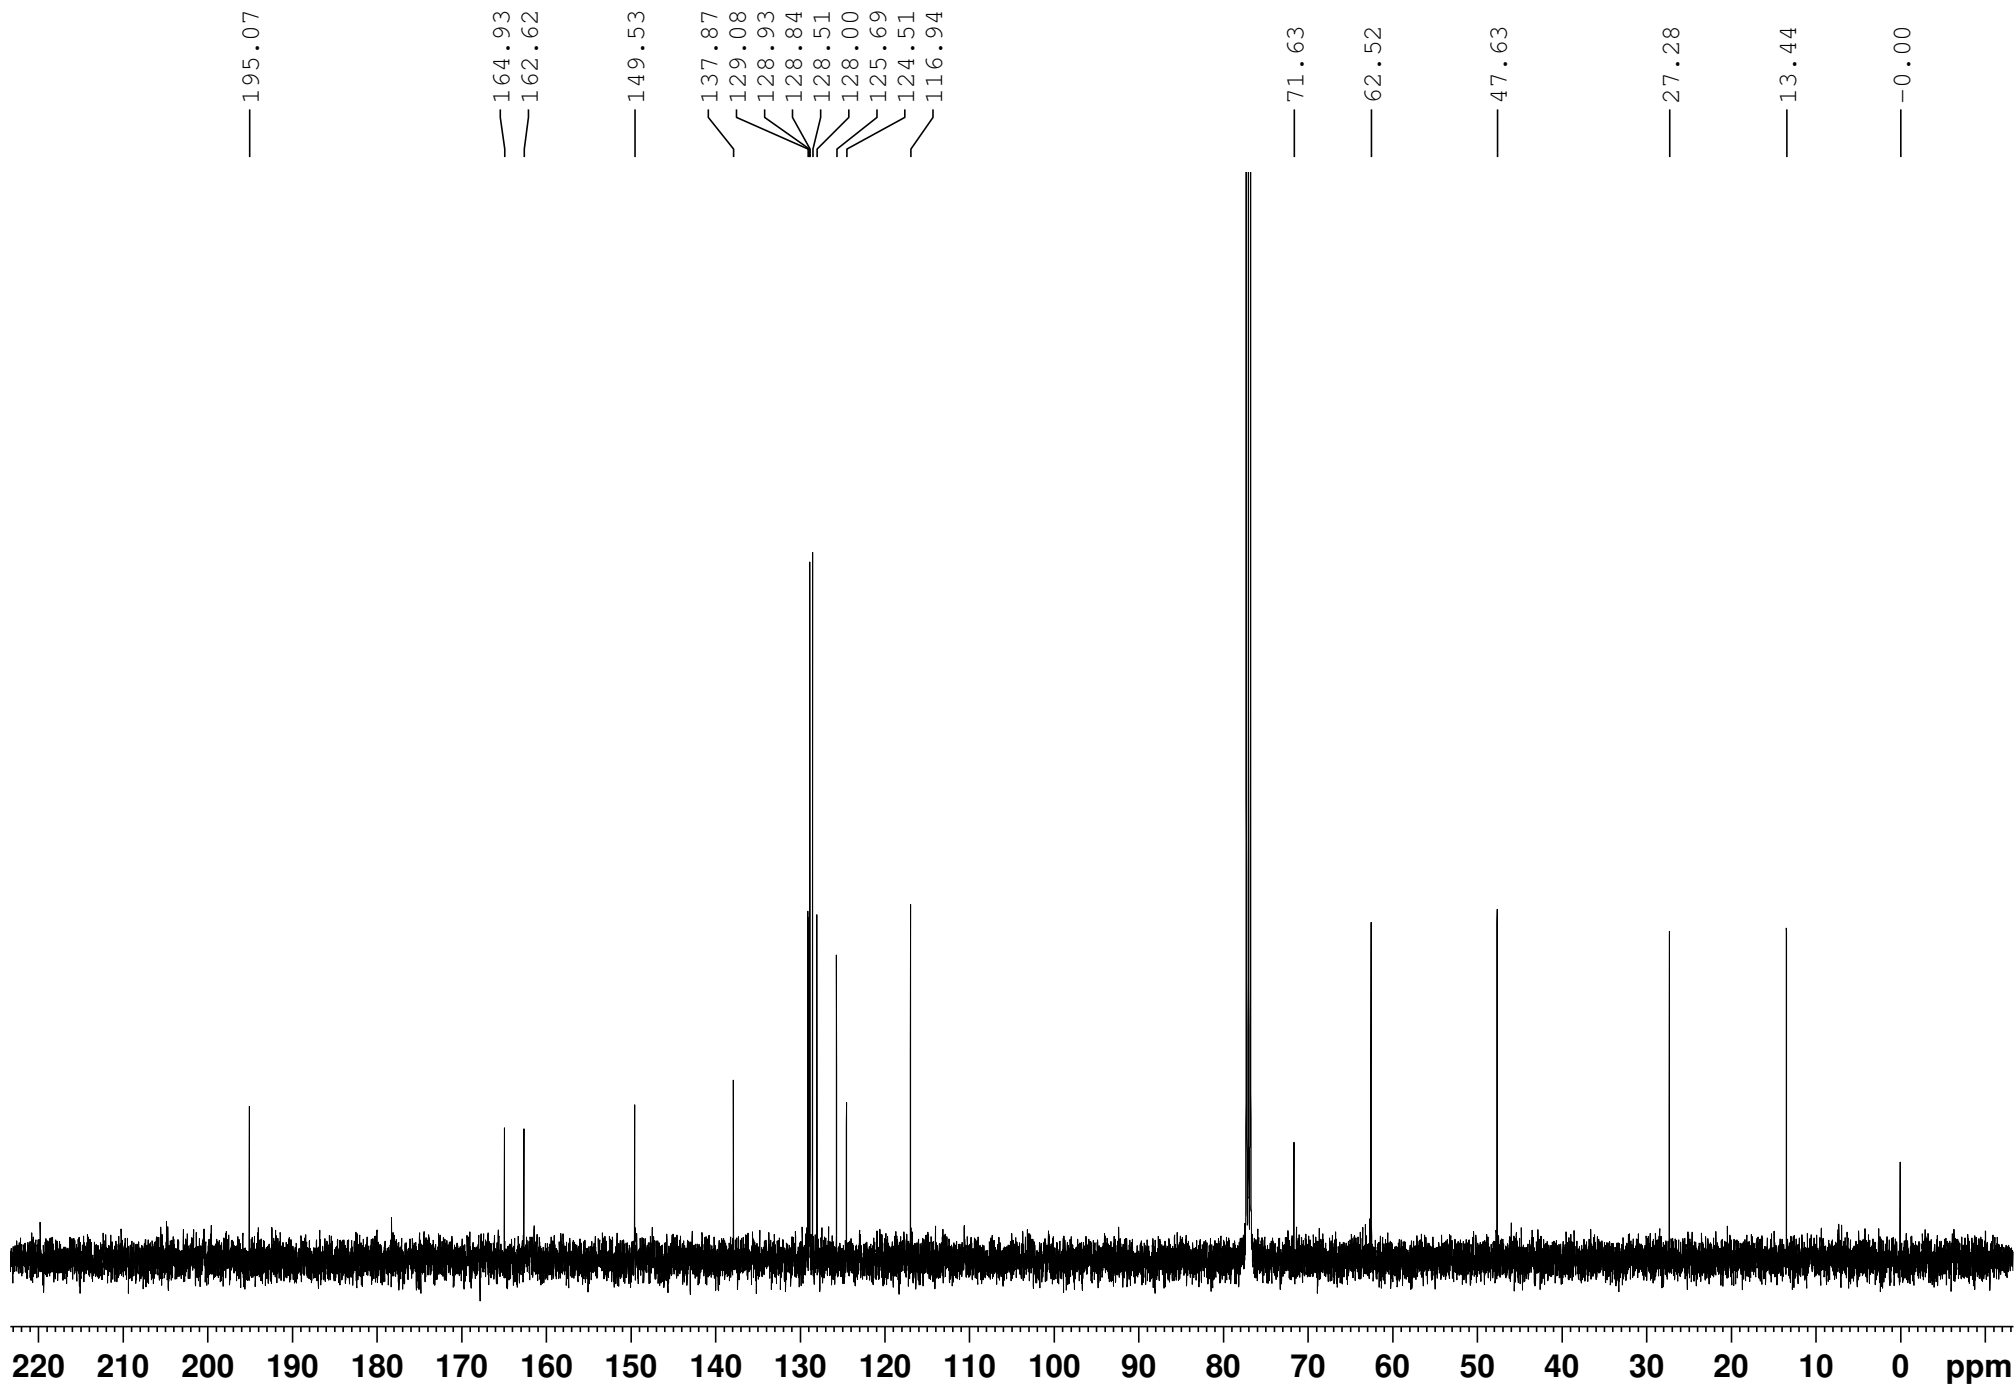

Supplement: Supplementary file 6 [file supplementary]

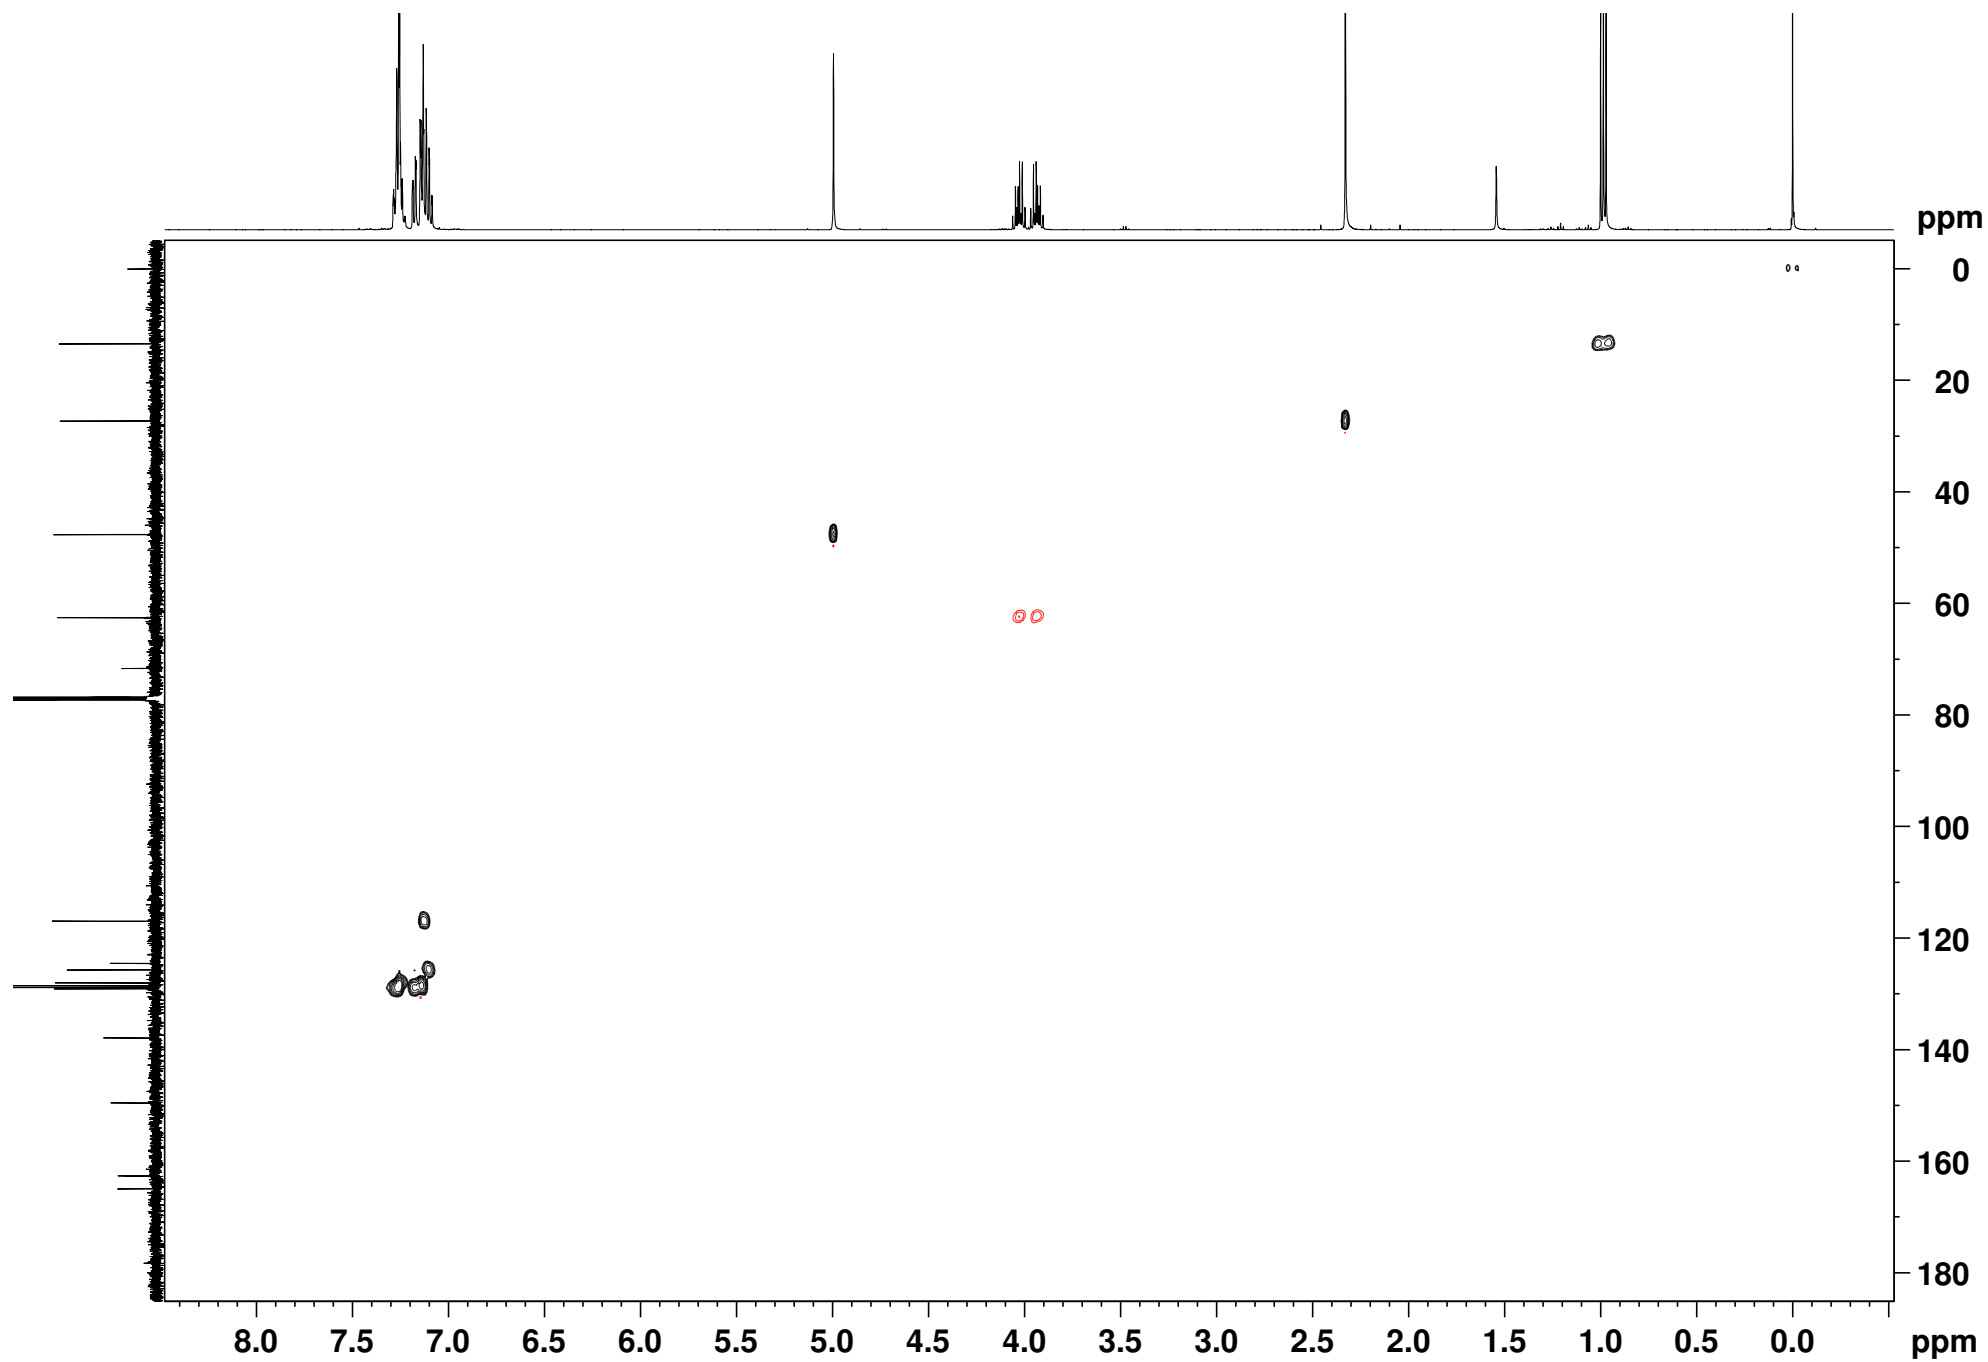

Supplement: Supplementary file 7 [file supplementary]

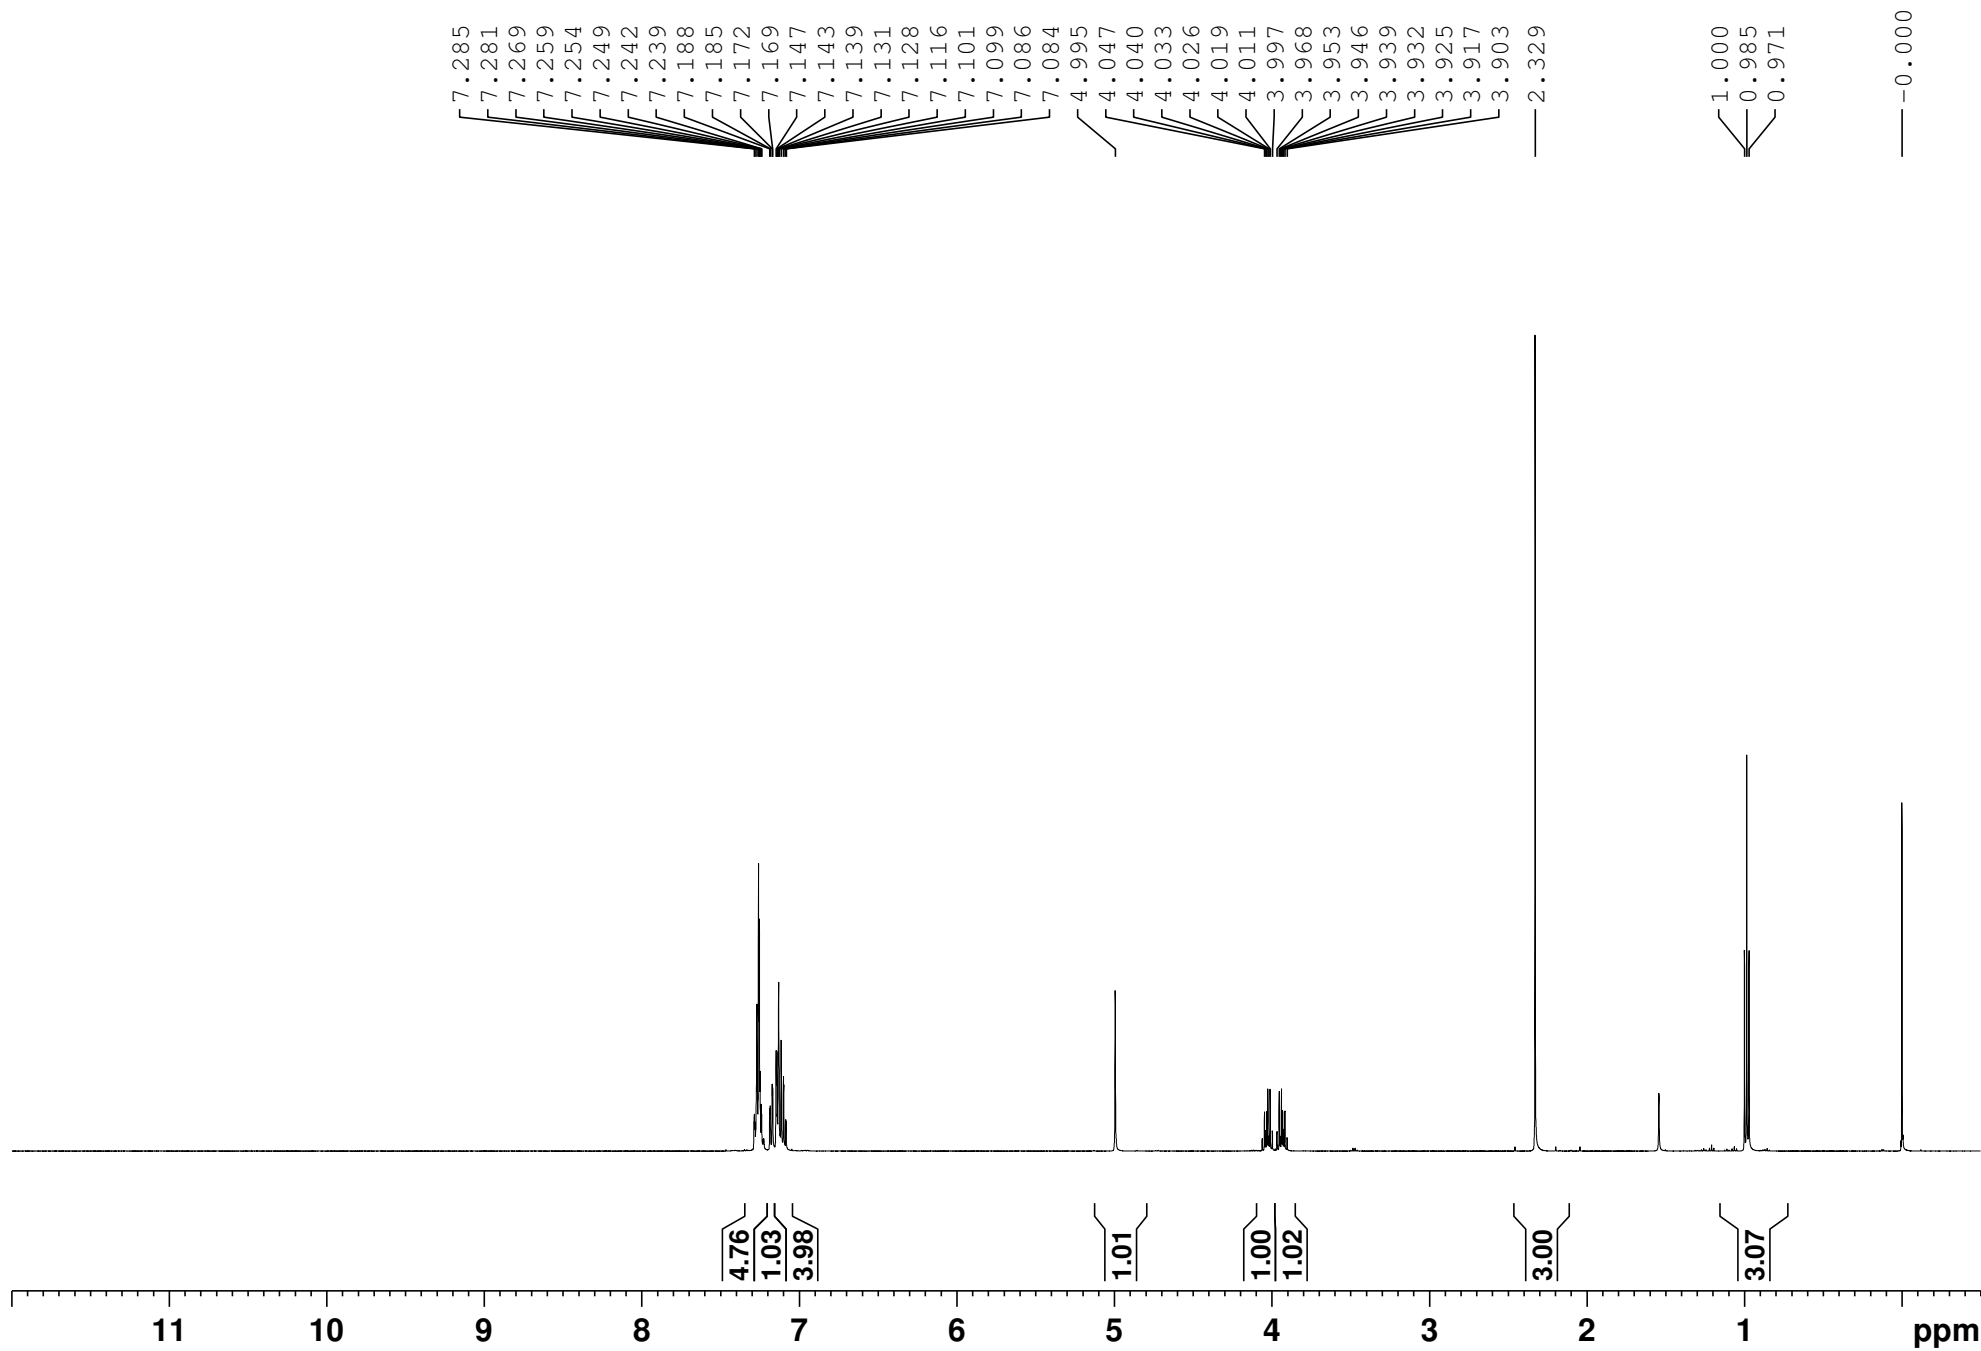

Supplement: Supplementary file 8 [file supplementary]

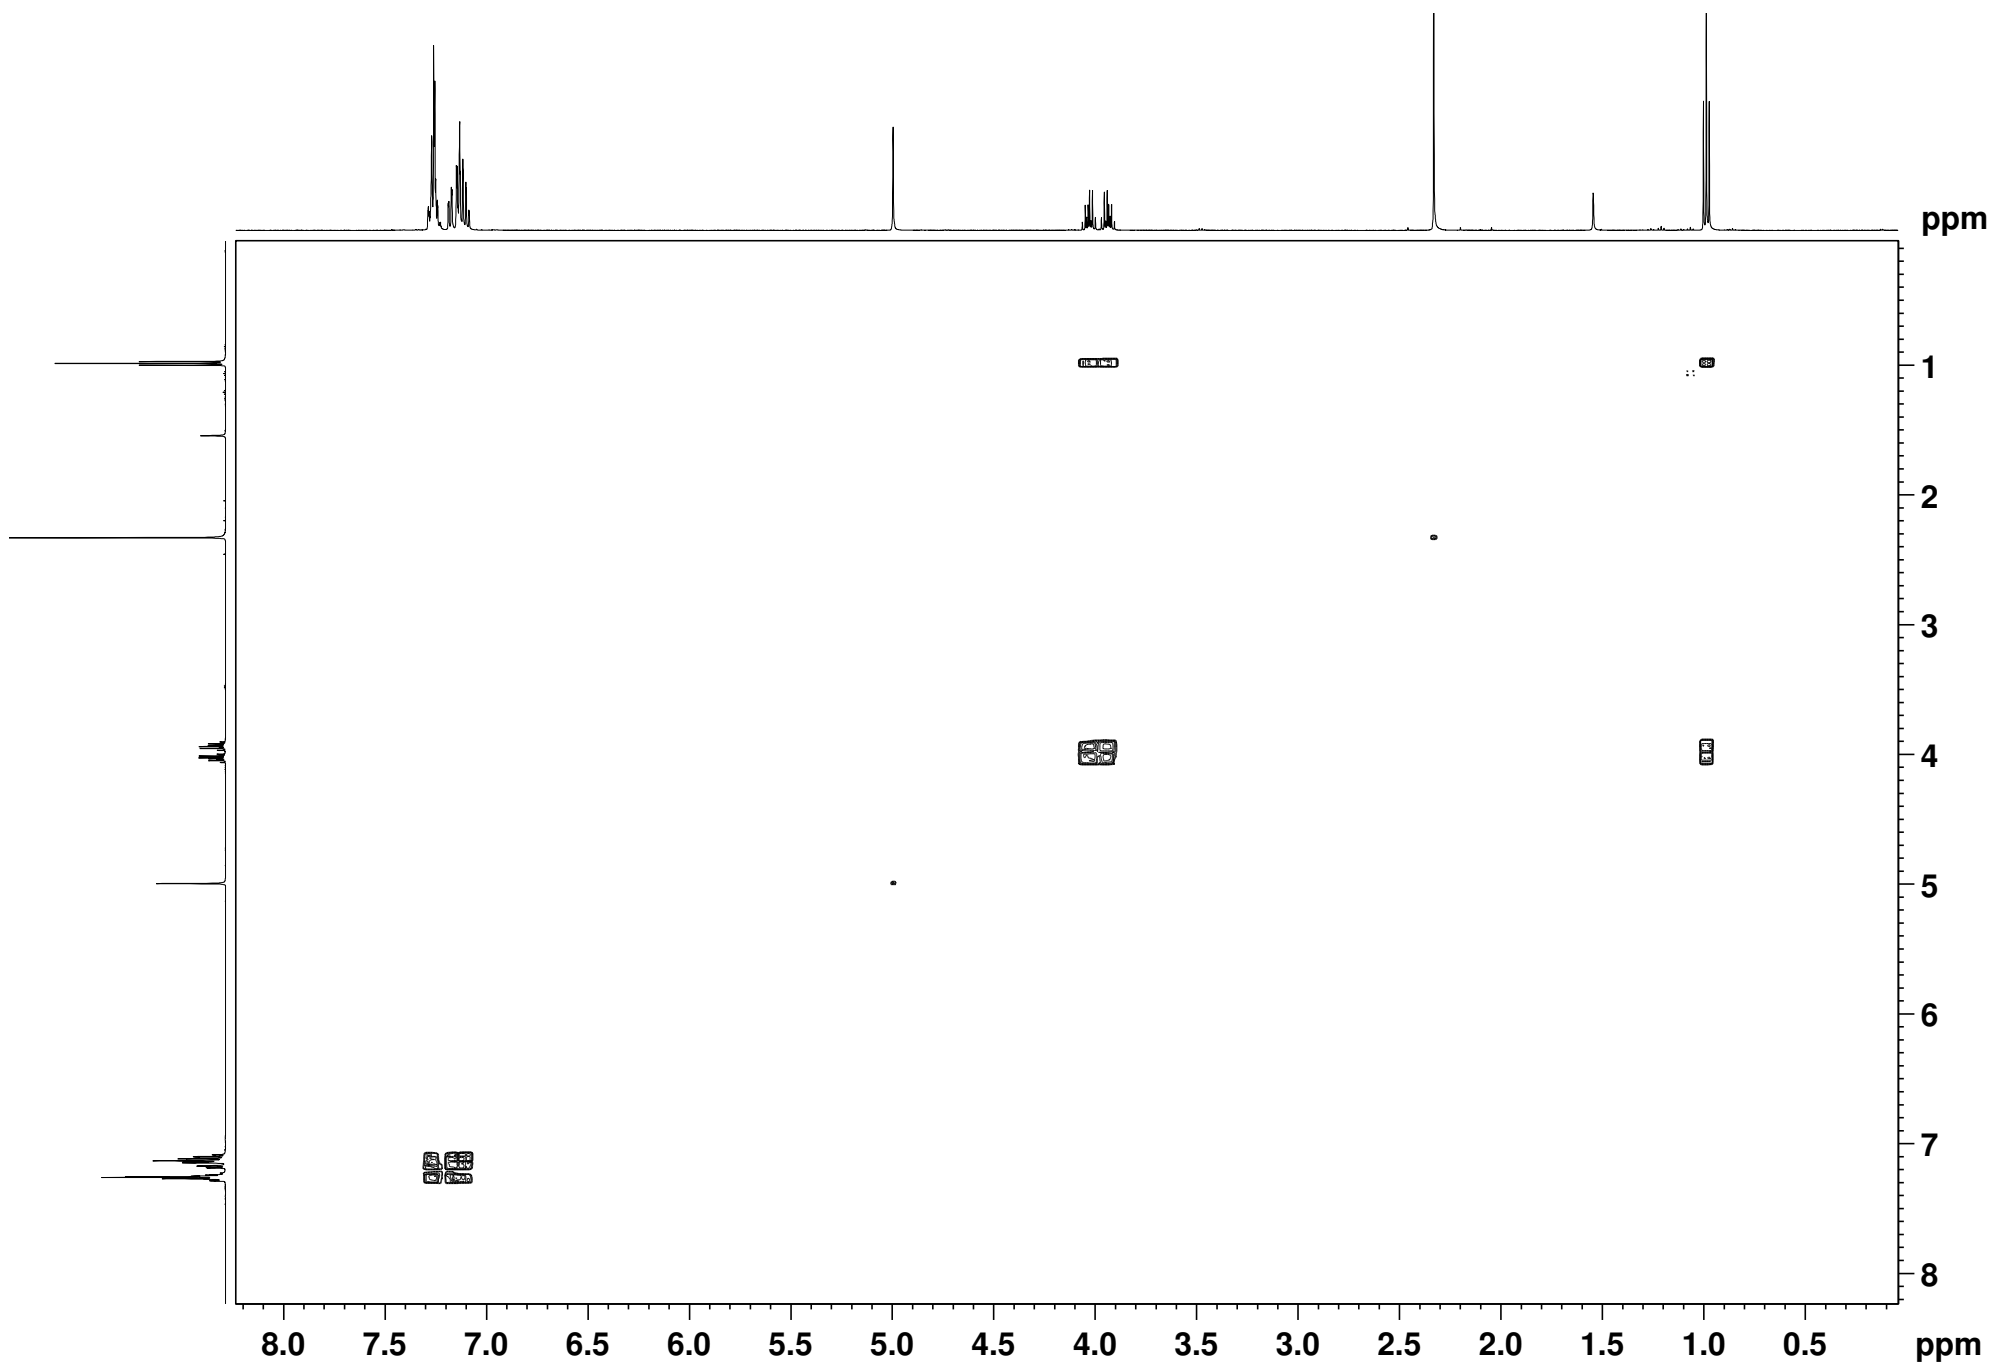

Supplement: Supplementary file 9 [file supplementary]

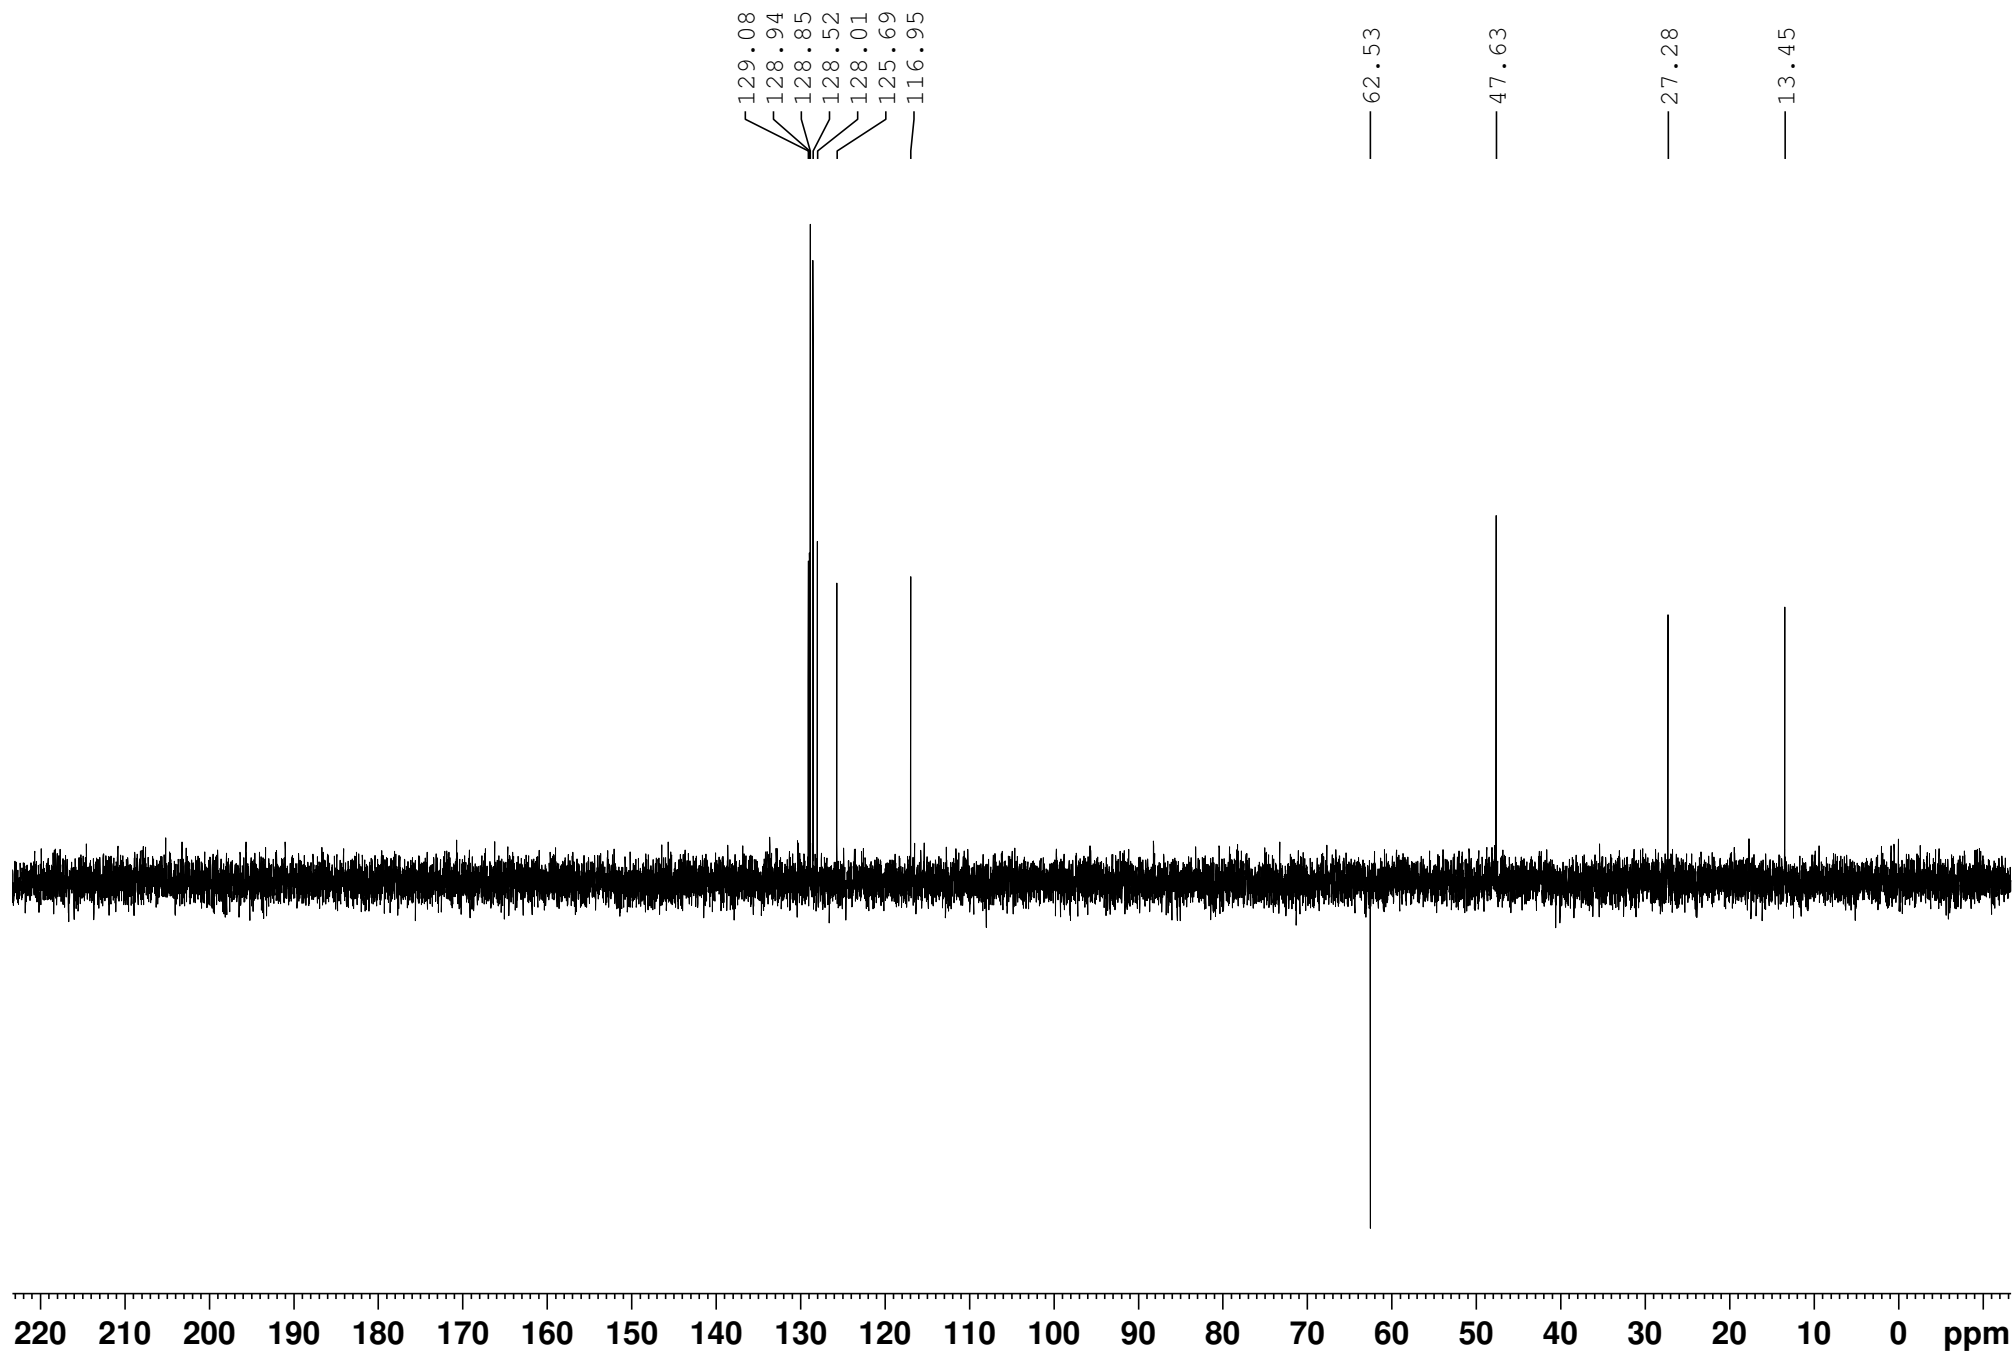

Supplement: Supplementary file 10 [file supplementary]
